# Supplementary material for: Benchmarking monolayer MoS2 and WS2 field-effect transistors
Source: PubMed Central journal article supplement (PMC7846590; doi:10.1038/s41467-020-20732-w), 2021-01-29
Supplement: 41467_2020_20732_MOESM1_ESM.pdf [file 41467_2020_20732_MOESM1_ESM.pdf]

# Supplementary Information

## Benchmarking Monolayer MoS<sub>2</sub> and WS<sub>2</sub> Field-Effect Transistors

*Amritanand Sebastian<sup>1</sup>, Rahul Pendurthi<sup>1</sup>, Tanushree H Choudhury<sup>2</sup>, Joan M Redwing<sup>2,3,4</sup>  
& Saptarshi Das<sup>1,3,4\*</sup>*

<sup>1</sup>*Department of Engineering Science and Mechanics, Pennsylvania State University, University Park, PA 16802*

<sup>2</sup>*2D Crystal Consortium-Materials Innovation Platform (2DCC-MIP), Pennsylvania State University, University Park, PA, 16802, USA*

<sup>3</sup>*Department of Materials Science and Engineering, Pennsylvania State University, University Park, PA 16802*

<sup>4</sup>*Materials Research Institute, Pennsylvania State University, University Park, PA 16802*

## Supplementary Figure 1

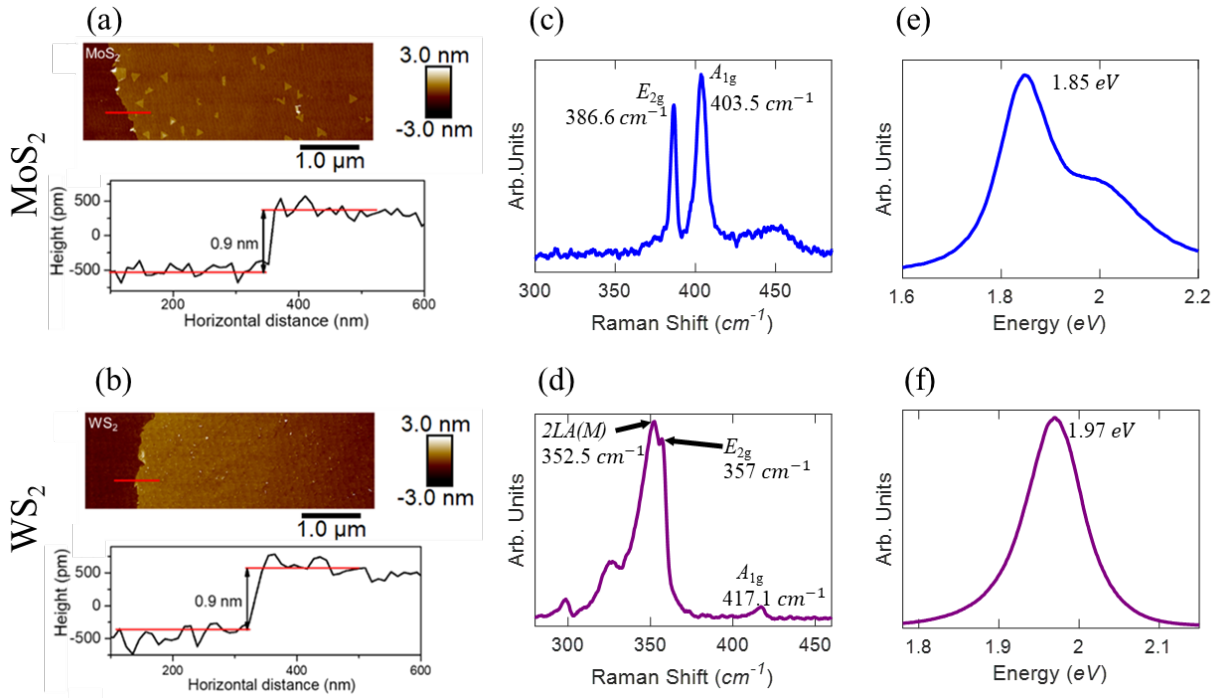

Supplementary Figure 1. Characterization of MOCVD grown monolayer  $\text{WS}_2$  and  $\text{MoS}_2$ . AFM of scratch and height profile across the scratch along the red line for (a)  $\text{MoS}_2$  and (b)  $\text{WS}_2$ . Raman spectrum with the characteristic peaks for c)  $\text{MoS}_2$  with  $E_{2g}$  at  $386.6 \text{ cm}^{-1}$  and  $A_{1g}$  at  $403.5 \text{ cm}^{-1}$  and d)  $\text{WS}_2$  with  $E_{2g}$  at  $357 \text{ cm}^{-1}$ ,  $A_{1g}$  at  $417.1 \text{ cm}^{-1}$  and  $2LA(M)$  at  $352.5 \text{ cm}^{-1}$ . PL spectrum for e)  $\text{MoS}_2$  and f)  $\text{WS}_2$  showing the characteristic monolayer response with peaks at  $1.85 \text{ eV}$  and  $1.97 \text{ eV}$ , respectively.

## Supplementary Figure 2

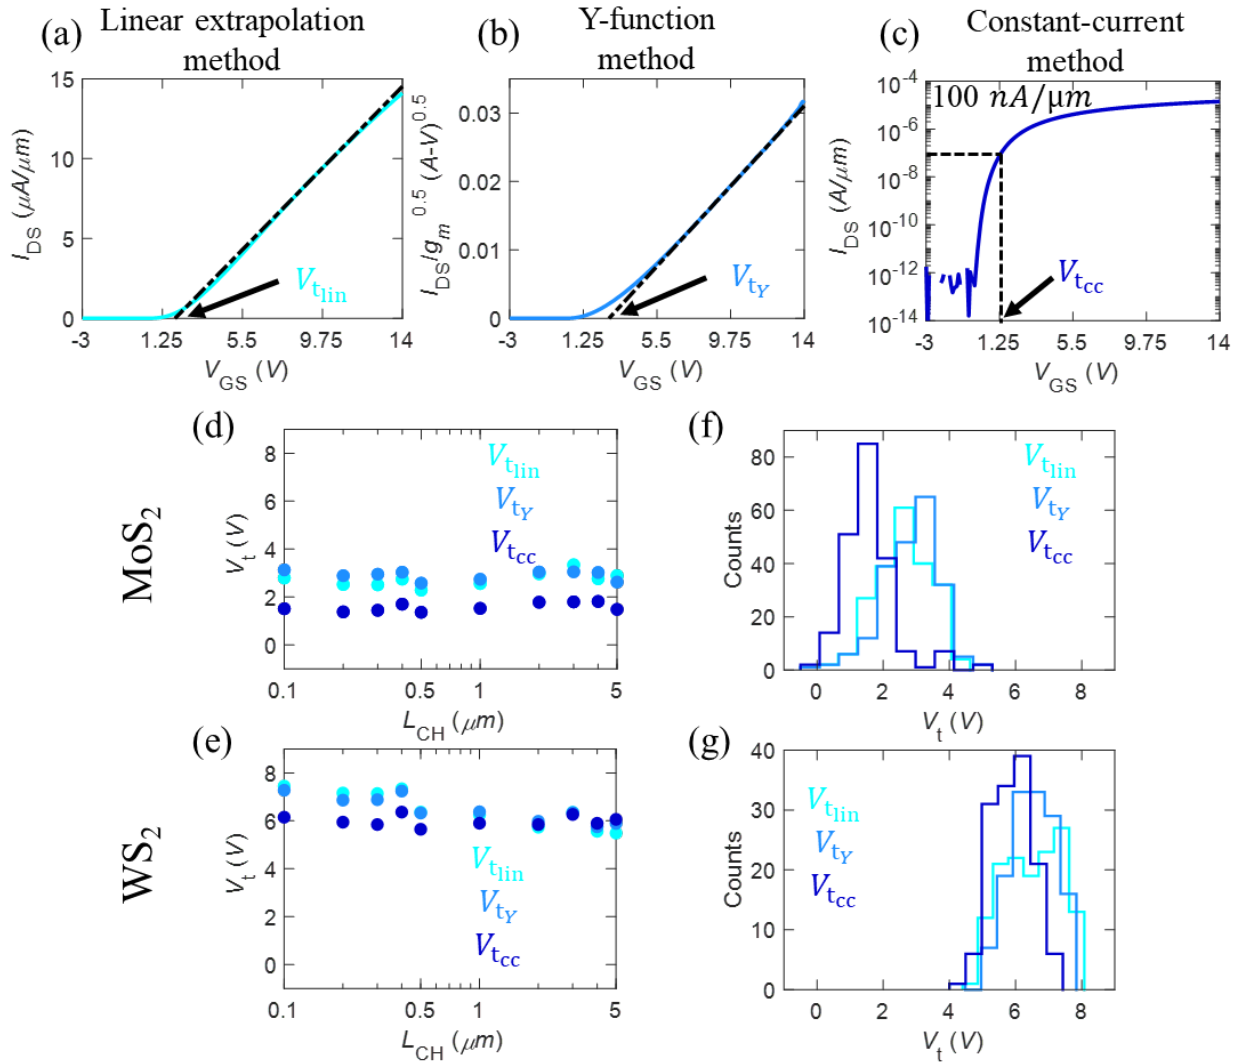

Supplementary Figure 2. Threshold voltage extraction, channel length dependence, and device to device variation. Threshold voltage extraction using a) linear extrapolation ( $V_{tlin}$ ), b) Y-function ( $V_{ty}$ ), and c) constant-current method ( $V_{tcc}$ ). The median values for  $V_{tlin}$ ,  $V_{ty}$ , and  $V_{tcc}$  versus channel length ( $L_{CH}$ ) showing no scaling effects for d) MoS<sub>2</sub> and e) WS<sub>2</sub>. Histograms showing the variation in  $V_{tlin}$ ,  $V_{ty}$ , and  $V_{tcc}$  across all measured devices for f) MoS<sub>2</sub> and g) WS<sub>2</sub> FETs for different channel lengths.

## Supplementary Note 1

In 2D FET literature, threshold voltage is extracted using various methods such as linear extrapolation ( $V_{tlin}$ ), Y-function ( $V_{ty}$ ), and constant-current method ( $V_{tcc}$ ) as shown in Supplementary Fig. 2a-c. Linear extrapolation is the most common among these techniques. However, poor ON-state performance, presence of SB at the metal/semiconductor interface, and contact-gating effect in a back-gated geometry can limit the use of linear extrapolation. Y-function method is more appropriate for contact dominated FETs. Finally, constant current method is simply another threshold voltage extraction technique, which is discussed for completeness. Clearly none of the extracted threshold voltages,  $V_{tlin}$ ,  $V_{ty}$ , and  $V_{tcc}$  show any channel length ( $L_{CH}$ ) dependence as evident from Supplementary Fig. 2d and 2e for MoS<sub>2</sub> and WS<sub>2</sub>, respectively. Supplementary Fig. 2f and 2g show the distributions of  $V_{tlin}$ ,  $V_{ty}$ , and  $V_{tcc}$  for all measured MoS<sub>2</sub> and WS<sub>2</sub> FETs, respectively. For MoS<sub>2</sub> FETs, the distributions of  $V_{ty}$  and  $V_{tlin}$  are very similar with median values of 2.9 V and 2.5 V, respectively. However,  $V_{tcc}$  results in lower median value of 1.5 V for MoS<sub>2</sub>, as the extraction is done at a constant current of 100 nA/ $\mu$ m, which is lower than the current at  $V_{tlin}$  and  $V_{ty}$ . A similar trend is observed for WS<sub>2</sub>, where both  $V_{ty}$  and  $V_{tlin}$  have median values of 6.5 V and 6.4 V, while  $V_{tcc}$  has a median value of 5.9 V. The corresponding standard deviations were found to be 0.8 V for  $V_{tlin}$ ,  $V_{ty}$ , and  $V_{tcc}$  for MoS<sub>2</sub> and 0.8 V, 0.7 V, and 0.6 V, respectively, for  $V_{tlin}$ ,  $V_{ty}$ , and  $V_{tcc}$ , in case of WS<sub>2</sub>. Supplementary Table 1 summarize the statistics of  $V_{tlin}$ ,  $V_{ty}$ , and  $V_{tcc}$

Supplementary Table 1

| Device-to-device variation in threshold voltage |                       |           |                       |          |
|-------------------------------------------------|-----------------------|-----------|-----------------------|----------|
|                                                 | MoS <sub>2</sub>      |           | WS <sub>2</sub>       |          |
|                                                 | Median, Mean $\pm$ SD | Min, Max  | Median, Mean $\pm$ SD | Min, Max |
| $V_{tcc}$ (V)                                   | 1.5, 1.7 $\pm$ 0.8    | -0.5, 5.3 | 5.9, 5.8 $\pm$ 0.6    | 4.2, 7.3 |
| $V_{ty}$ (V)                                    | 2.9, 2.8 $\pm$ 0.8    | -0.1, 5.3 | 6.5, 6.5 $\pm$ 0.7    | 4.2, 7.8 |
| $V_{tlin}$ (V)                                  | 2.5, 2.9 $\pm$ 0.8    | -0.1, 4.5 | 6.4, 6.5 $\pm$ 0.8    | 4.5, 8   |

## Supplementary Note 2

It is important to discuss the possible origin of the variation seen in the electrical characteristics of monolayer MoS<sub>2</sub> and WS<sub>2</sub> FETs. Low device-to-device variation in MoS<sub>2</sub> and WS<sub>2</sub> FETs is attributed to the MOCVD growth of single-crystalline and epitaxial monolayers on the sapphire substrates. This is confirmed by in-plane XRD phi-scans in Fig. 1e and 1f, for MoS<sub>2</sub> and WS<sub>2</sub>, respectively, which show six-fold rotational symmetry and epitaxial alignment of the monolayer with the underlying sapphire. If the films were polycrystalline with a high degree of misorientation within the plane of the film, then we would expect to see multiple peaks at different angles in the in-plane XRD scan. These films were also transferred to a Quantifoil Cu grid to investigate the microstructure in TEM by using selected area diffraction pattern (SAED) and dark field imaging. As shown in detailed materials characterization of these films (<https://www.mri.psu.edu/2d-crystal-consortium/user-facilities/thin-films/list-thin-film-samples-available>) the respective SAED patterns show a single crystalline pattern, while composite dark field maps illuminate two contrasting regions in the monolayer films. For MoS<sub>2</sub> these regions correspond to anti-phase domains. For WS<sub>2</sub> however, the regions are unidirectional and are separated by translational boundaries. We believe that it is possible to reduce the spatial variations in 2D FETs through further optimization of growth and improvement in fabrication process flow, which is unlikely for UTB Si owing to significant thickness variations at length scales similar to monolayer MoS<sub>2</sub> and WS<sub>2</sub>. In addition, random dopant fluctuations and detrimental quantum confinement effects leading to increase in the bandgap of ultra-thin Si open up opportunities for 2D materials for advanced scaling nodes.

### Supplementary Figure 3

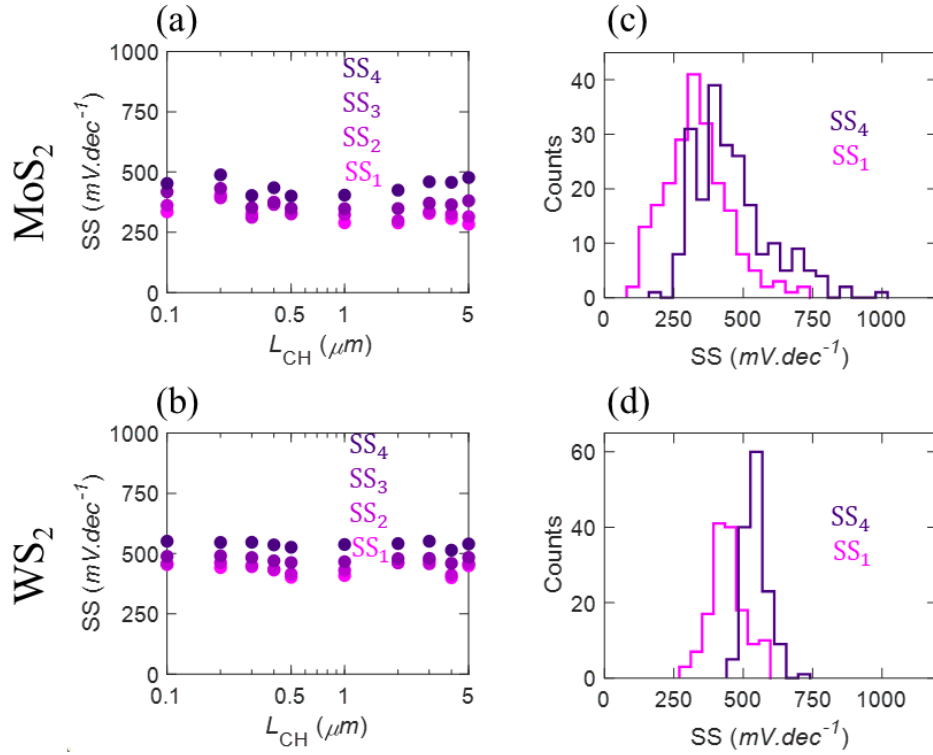

Supplementary Figure 3. Channel length dependence and device to device variation in subthreshold slope. The median subthreshold slope extracted over 1 (SS<sub>1</sub>), 2 (SS<sub>2</sub>), 3 (SS<sub>3</sub>), and 4 (SS<sub>4</sub>) orders of magnitude change in the drain current for a) MoS<sub>2</sub> and b) WS<sub>2</sub> as a function of  $L_{CH}$ . No  $L_{CH}$  dependence is observed. Histograms showing the device-to-device variation in SS<sub>1</sub> and SS<sub>4</sub> across all c) MoS<sub>2</sub> and d) WS<sub>2</sub> FETs.

### Supplementary Table 2

| Device-to-device variation in subthreshold slope and interface traps |                       |            |                       |           |
|----------------------------------------------------------------------|-----------------------|------------|-----------------------|-----------|
|                                                                      | MoS <sub>2</sub>      |            | WS <sub>2</sub>       |           |
|                                                                      | Median, Mean $\pm$ SD | Min, Max   | Median, Mean $\pm$ SD | Min, Max  |
| SS <sub>1</sub> ( $mV.dec^{-1}$ )                                    | 327, 335 $\pm$ 115    | 93, 729    | 438, 443 $\pm$ 66     | 296, 596  |
| SS <sub>2</sub> ( $mV.dec^{-1}$ )                                    | 335, 344 $\pm$ 109    | 103, 740   | 449, 453 $\pm$ 56     | 305, 618  |
| SS <sub>3</sub> ( $mV.dec^{-1}$ )                                    | 369, 386 $\pm$ 116    | 124, 791   | 480, 483 $\pm$ 45     | 369, 621  |
| SS <sub>4</sub> ( $mV.dec^{-1}$ )                                    | 432, 460 $\pm$ 138    | 166, 1000  | 541, 546 $\pm$ 42     | 453, 738  |
| $D_{IT}$ ( $10^{12} eV^{-1}cm^{-2}$ )                                | 6.2, 6.6 $\pm$ 2.3    | 1.75, 15.7 | 8, 8.1 $\pm$ 0.7      | 6.5, 11.2 |

## Supplementary Figure 4

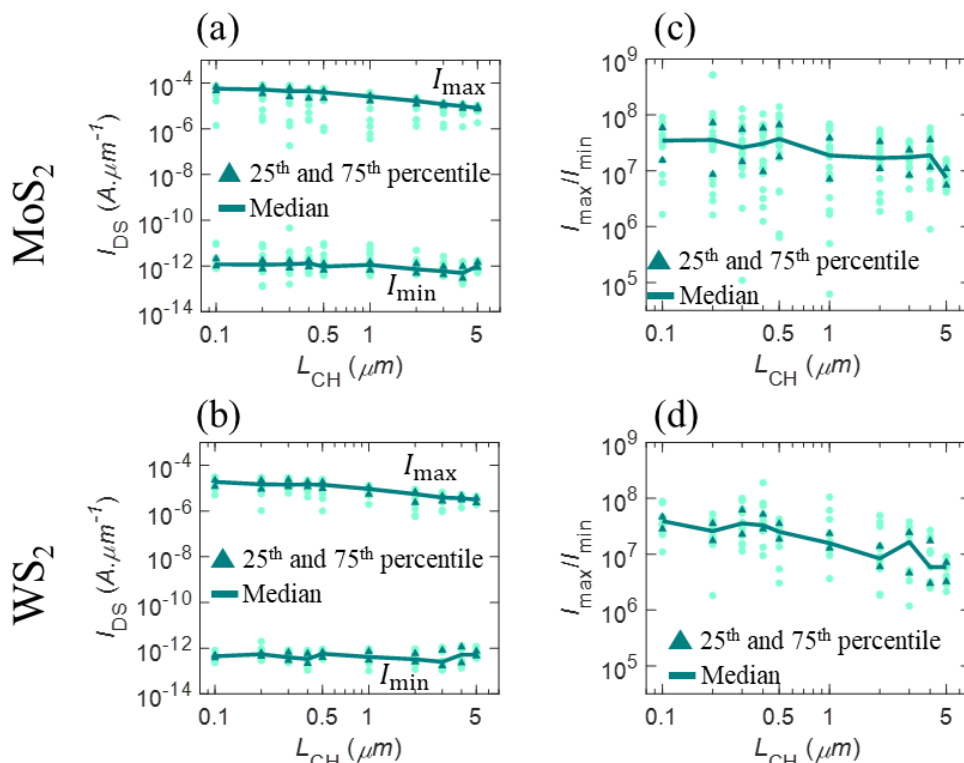

Supplementary Figure 4. Channel length dependence of maximum, minimum, and ratio of maximum to minimum current. Distribution of maximum current ( $I_{\max}$ ) and minimum current ( $I_{\min}$ ) for different channel lengths for a) MoS<sub>2</sub> and b) WS<sub>2</sub> FETs, extracted from the transfer characteristics. Median, 25<sup>th</sup> percentile and 75<sup>th</sup> percentile is denoted. Distribution of ratio of maximum to minimum current ratio ( $I_{\max}/I_{\min}$ ) for different  $L_{\text{CH}}$  for c) MoS<sub>2</sub> and d) WS<sub>2</sub> FETs.  $I_{\max}/I_{\min}$  is mostly found to be independent of  $L_{\text{CH}}$  for both MoS<sub>2</sub> and WS<sub>2</sub> FETs. Note that  $I_{\max}$  demonstrates some  $L_{\text{CH}}$  dependence for longer channel devices with  $L_{\text{CH}} \geq 1 \mu\text{m}$  for MoS<sub>2</sub> and WS<sub>2</sub> FETs due to the linear scaling law but can be ignored for  $I_{\max}/I_{\min}$  which is measured in orders of magnitude.

## Supplementary Table 3

| Device-to-device variation in $I_{\max}/I_{\min}$ |                       |                           |                       |          |
|---------------------------------------------------|-----------------------|---------------------------|-----------------------|----------|
|                                                   | MoS <sub>2</sub>      |                           | WS <sub>2</sub>       |          |
|                                                   | Median, Mean $\pm$ SD | Min, Max                  | Median, Mean $\pm$ SD | Min, Max |
| $I_{\max}/I_{\min} (\times 10^7)$                 | 2.1, $3.4 \pm 5.5$    | $6.2 \times 10^{-3}$ , 52 | 2.1, $2.7 \pm 2.6$    | 0.1, 19  |

## Supplementary Table 4

| Benchmarking median $I_{\max}/I_{\min}$ for $L_{\text{CH}} = 100 \text{ nm}$ |                         |          |                           |                                                |
|------------------------------------------------------------------------------|-------------------------|----------|---------------------------|------------------------------------------------|
|                                                                              | $I_{\max}/I_{\min}$     | EOT (nm) | $V_{\text{GS,Range}}$ (V) | $SV_{\text{GS,Range}}$ (V)<br>at SEOT = 0.9 nm |
| [1] - MoS <sub>2</sub>                                                       | $\approx 7 \times 10^6$ | 1.9      | 1.5 to -0.5 (2)           | 0.94                                           |
| [1] - MoS <sub>2</sub>                                                       | $\approx 4 \times 10^6$ | 50       | -                         | -                                              |
| Our Work - MoS <sub>2</sub>                                                  | $3.5 \times 10^7$       | 22       | 14 to -3 (17)             | 0.65                                           |
| Our Work - WS <sub>2</sub>                                                   | $3.9 \times 10^7$       | 22       | 12 to -5 (17)             | 0.65                                           |
| [2] - UTB SOI                                                                | $1.3 \times 10^6$       | 4        | 1.8 to -0.2 (2)           | 0.45                                           |

## Supplementary Note 3

Mobility from peak Transconductance: The field-effect electron mobility is extracted from the transconductance ( $g_m$ ) using Supplementary Equation (S1).

$$\mu_{g_m} = \frac{dI_{\text{DS}}}{dV_{\text{GS}}} \left( \frac{L_{\text{CH}}}{WC_{\text{OX}}V_{\text{DS}}} \right) \quad (\text{S1})$$

Y-function mobility: The linear part of Y-function, given by Supplementary Equation (S2) is extrapolated to obtain Y-function threshold.  $\mu_Y$  is extracted using the slope of Y-function *versus*  $V_{\text{GS}} - V_{\text{tY}}$

$$Y = \frac{I_{\text{DS}}}{\sqrt{g_m}} = (\mu_Y WC_{\text{OX}}V_{\text{DS}})^{0.5} (V_{\text{GS}} - V_{\text{tY}}) \quad (\text{S2})$$

TLM mobility: TLM mobility ( $\mu_{\text{TLM}}$ ) is obtained from the slope of the total resistance ( $R_{\text{T}}$ ) *versus*  $L_{\text{CH}}$  using Supplementary Equation (S3).

$$R_{\text{T}} = 2R_{\text{c}} + R_{\text{ch}}; R_{\text{ch}} = \frac{L_{\text{CH}}}{\mu_{\text{TLM}}C_{\text{OX}}(V_{\text{GS}} - V_{\text{tlin}})} = \frac{L_{\text{CH}}}{qn_{\text{S}}\mu_{\text{TLM}}}; n_{\text{S}} = \frac{C_{\text{OX}}(V_{\text{GS}} - V_{\text{tlin}})}{q} \quad (\text{S3})$$



## Supplementary Figure 5

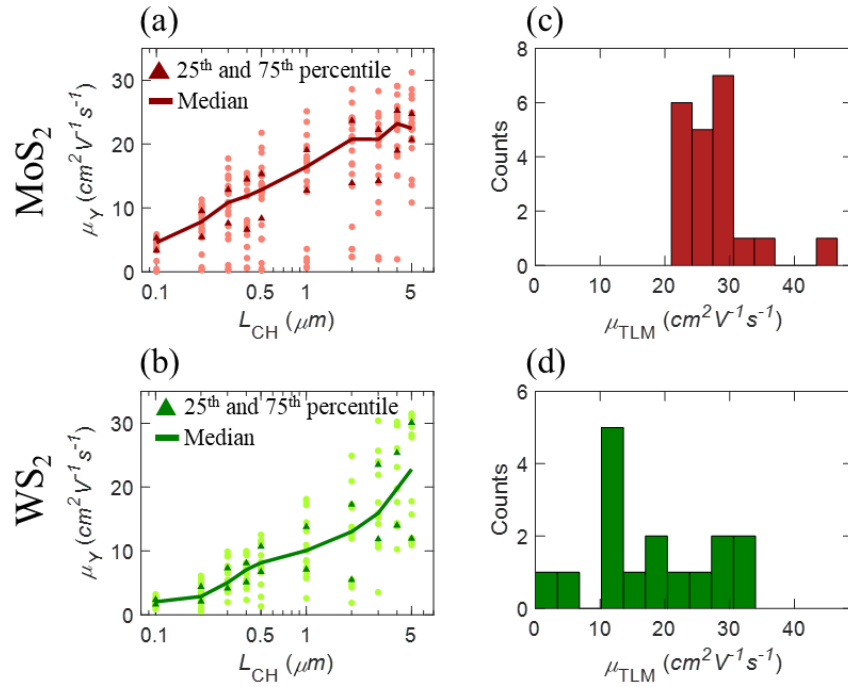

Supplementary Figure 5. Device-to-device variation in Y-function mobility and TLM mobility. The distribution of Y-function mobility ( $\mu_Y$ ) for different channel lengths ( $L_{\text{CH}}$ ) for a) MoS<sub>2</sub> and b) WS<sub>2</sub> FETs. Median, 25<sup>th</sup> percentile and 75<sup>th</sup> percentile is denoted. The distribution of the TLM mobility ( $\mu_{\text{TLM}}$ ) for c) MoS<sub>2</sub> and d) WS<sub>2</sub>

## Supplementary Table 5

| Device-to-device variation in field-effect carrier mobility |                       |          |                       |          |                                                   |          |                       |          |
|-------------------------------------------------------------|-----------------------|----------|-----------------------|----------|---------------------------------------------------|----------|-----------------------|----------|
| $\mu_{g_m} (\text{cm}^2 \text{V}^{-1} \text{s}^{-1})$       |                       |          |                       |          | $\mu_Y (\text{cm}^2 \text{V}^{-1} \text{s}^{-1})$ |          |                       |          |
|                                                             | MoS <sub>2</sub>      |          | WS <sub>2</sub>       |          | MoS <sub>2</sub>                                  |          | WS <sub>2</sub>       |          |
| $L_{\text{CH}} (\mu\text{m})$                               | Median, Mean $\pm$ SD | Min, Max | Median, Mean $\pm$ SD | Min, Max | Median, Mean $\pm$ SD                             | Min, Max | Median, Mean $\pm$ SD | Min, Max |
| 0.1                                                         | 4, 4 $\pm$ 1          | 1, 5     | 3, 3 $\pm$ 1          | 2, 5     | 5, 4 $\pm$ 2                                      | 0.1, 6   | 2, 2 $\pm$ 0.6        | 0.9, 3   |
| 0.2                                                         | 7, 7 $\pm$ 3          | 0.3, 11  | 4, 4 $\pm$ 2          | 1, 8     | 8, 7 $\pm$ 3                                      | 0.3, 11  | 3, 3.2 $\pm$ 2        | 0.6, 6   |
| 0.3                                                         | 10, 9 $\pm$ 4         | 0.3, 15  | 7, 7 $\pm$ 3          | 3, 11    | 11, 10 $\pm$ 5                                    | 0.3, 18  | 5, 6 $\pm$ 2          | 2, 10    |
| 0.4                                                         | 11, 9 $\pm$ 4         | 0.7, 15  | 9, 7 $\pm$ 3          | 2, 11    | 12, 10 $\pm$ 5                                    | 0.6, 16  | 7, 7 $\pm$ 2          | 2, 10    |
| 0.5                                                         | 12, 11 $\pm$ 5        | 0.2, 18  | 9, 9 $\pm$ 3          | 1, 12    | 13, 12 $\pm$ 6                                    | 0.3, 22  | 8, 8 $\pm$ 3          | 1, 13    |

|   |            |        |            |        |            |         |            |        |
|---|------------|--------|------------|--------|------------|---------|------------|--------|
| 1 | 15, 14 ± 5 | 2, 23  | 10, 10 ± 5 | 2, 19  | 17, 14 ± 7 | 0.6, 25 | 10, 11 ± 5 | 3, 18  |
| 2 | 19, 18 ± 7 | 3, 26  | 12, 12 ± 6 | 2, 24  | 21, 18 ± 8 | 2, 29   | 13, 13 ± 7 | 2, 25  |
| 3 | 18, 20 ± 4 | 13, 27 | 18, 19 ± 7 | 8, 29  | 21, 18 ± 7 | 2, 28   | 16, 17 ± 8 | 4, 30  |
| 4 | 23, 23 ± 4 | 17, 28 | 21, 20 ± 6 | 12, 30 | 23, 22 ± 6 | 2, 29   | 20, 20 ± 7 | 10, 30 |
| 5 | 24, 24 ± 3 | 17, 30 | 29, 24 ± 9 | 12, 33 | 23, 22 ± 5 | 11, 31  | 23, 22 ± 9 | 11, 32 |

### Supplementary Note 4

We have evaluated  $n_S$  by considering the effect of  $C_{IT}$ . After evaluating  $C_{IT}$  from the subthreshold slope, Supplementary Equation (S4) was used to evaluate  $n_S$  in the ON-state.

$$n_S = \frac{C_G}{q} (V_{GS} - V_{t_{lin}}); \quad C_G = \frac{C_{OX} (C_{IT} + C_S)}{C_{OX} + C_{IT} + C_S}; \quad C_S = \frac{q^2 n_S}{k_B T} \quad (S4)$$

Here,  $C_G$  is the total gate capacitance.  $n_S = 10^{13} \text{ cm}^{-2}$  for MoS<sub>2</sub> and  $n_S = 4.4 \times 10^{12} \text{ cm}^{-2}$  for WS<sub>2</sub> used in the main text corresponds to  $C_S$  of  $6.13 \times 10^{-1} \text{ F} \cdot \text{m}^{-2}$  and  $2.7 \times 10^{-1} \text{ F} \cdot \text{m}^{-2}$  respectively. Maximum  $C_{IT}$  is found to be  $2.5 \times 10^{-2} \text{ F} \cdot \text{m}^{-2}$  and  $1.7 \times 10^{-2} \text{ F} \cdot \text{m}^{-2}$  for MoS<sub>2</sub> and WS<sub>2</sub>, respectively and  $C_{OX} = 1.6 \times 10^{-3} \text{ F} \cdot \text{m}^{-2}$ . Hence, in the ON-state  $C_S \gg C_{IT}$  as well as  $C_S \gg C_{OX}$ , resulting in  $C_G \approx C_{OX}$ , simplifying Supplementary Equation (S4) into Supplementary Equation (S5).

$$n_S = \frac{C_{OX}}{q} (V_{GS} - V_{t_{lin}}) \quad (S5)$$

To obtain a constant  $n_S$ , a constant overdrive voltage ( $V_{GS} - V_{t_{lin}}$ ) is ensured by extracting the  $V_{t_{lin}}$  and then estimating the required  $V_{GS}$  for every device.  $I_{ON}$  is extracted from the output characteristics with a  $V_{GS}$  step size of 2 V, and the median error in  $n_S$  is  $0.11 \times 10^{12} \text{ cm}^{-2}$  and  $0.03 \times 10^{12} \text{ cm}^{-2}$  for MoS<sub>2</sub> and WS<sub>2</sub> FETs, respectively.  $n_S$  is also found for the analysis of  $R_c$ .  $R_c$  is extracted from the transfer characteristics with a  $V_{GS}$  step size of 85 mV, and median error in  $n_S$  is 0.003 and  $0.004 \times 10^{12} \text{ cm}^{-2}$  for MoS<sub>2</sub> and WS<sub>2</sub> FETs, respectively.

Supplementary Table 6

| Device-to-device variation in TLM mobility                 |                       |            |                       |          |
|------------------------------------------------------------|-----------------------|------------|-----------------------|----------|
|                                                            | MoS <sub>2</sub>      |            | WS <sub>2</sub>       |          |
|                                                            | Median, Mean $\pm$ SD | Min, Max   | Median, Mean $\pm$ SD | Min, Max |
| $\mu_{\text{TLM}}(\text{cm}^2 \text{V}^{-1}\text{s}^{-1})$ | 27.3, 27.7 $\pm$ 5.5  | 21.1, 46.5 | 16.2, 17.9 $\pm$ 9.7  | 2, 33.3  |

Supplementary Figure 6

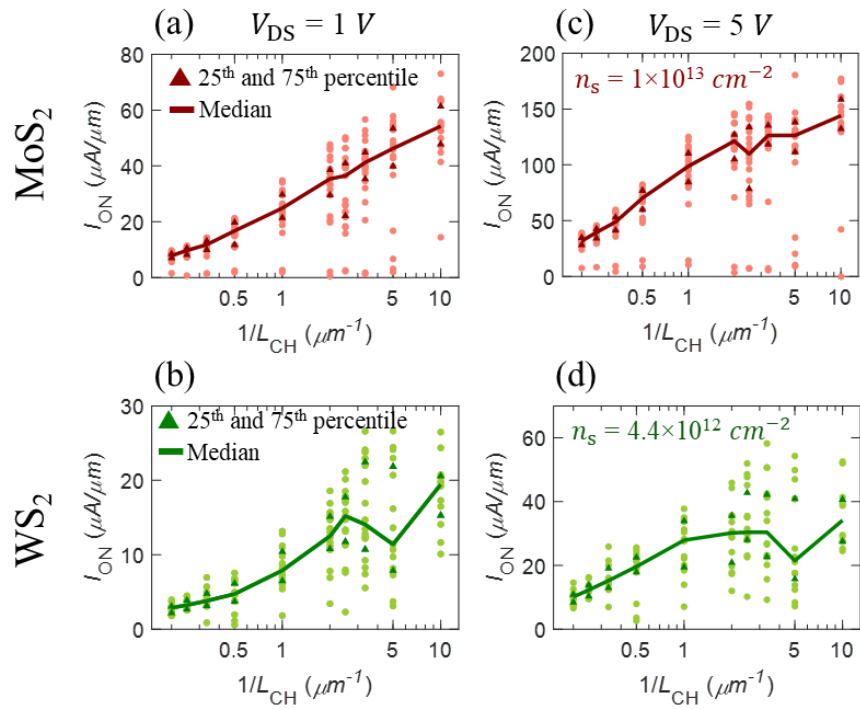

Supplementary Figure 6. Channel length dependence of drive current. Distribution of  $I_{\text{ON}}$  as a function of channel length ( $L_{\text{CH}}$ ) for a) MoS<sub>2</sub> and b) WS<sub>2</sub> FETs for  $V_{\text{DS}}$  of 1 V, and for c) MoS<sub>2</sub> and d) WS<sub>2</sub> FETs for  $V_{\text{DS}}$  of 5 V. Note that the distribution is plotted as a function of  $1/L_{\text{CH}}$ . Median, 25<sup>th</sup> percentile and 75<sup>th</sup> percentile is denoted.

Supplementary Table 7

| Device-to-device variation in the drive current |                          |          |                          |             |                                               |             |                          |             |
|-------------------------------------------------|--------------------------|----------|--------------------------|-------------|-----------------------------------------------|-------------|--------------------------|-------------|
| $I_{ON}(\mu A. \mu m^{-1})$ at $V_{DS} = 1 V$   |                          |          |                          |             | $I_{ON}(\mu A. \mu m^{-1})$ at $V_{DS} = 5 V$ |             |                          |             |
|                                                 | MoS <sub>2</sub>         |          | WS <sub>2</sub>          |             | MoS <sub>2</sub>                              |             | WS <sub>2</sub>          |             |
| $L_{CH}$ ( $\mu m$ )                            | Median,<br>Mean $\pm$ SD | Min, Max | Median,<br>Mean $\pm$ SD | Min,<br>Max | Median,<br>Mean $\pm$ SD                      | Min,<br>Max | Median,<br>Mean $\pm$ SD | Min,<br>Max |
| 0.1                                             | 54, 52 $\pm$ 13          | 14, 73   | 17, 18 $\pm$ 5           | 10, 26      | 146, 141 $\pm$ 32                             | 42, 177     | 30, 34 $\pm$ 10          | 25, 53      |
| 0.2                                             | 46, 41 $\pm$ 18          | 2, 68    | 11, 13 $\pm$ 8           | 3, 27       | 126, 109 $\pm$ 47                             | 9, 180      | 20, 25 $\pm$ 14          | 7, 50       |
| 0.3                                             | 41, 38 $\pm$ 14          | 1, 57    | 14, 15 $\pm$ 6           | 6, 24       | 126, 116 $\pm$ 38                             | 6, 144      | 28, 30 $\pm$ 13          | 9, 51       |
| 0.4                                             | 36, 31 $\pm$ 14          | 2, 50    | 15, 14 $\pm$ 5           | 2, 20       | 110, 104 $\pm$ 41                             | 7, 155      | 30, 31 $\pm$ 9           | 10, 49      |
| 0.5                                             | 35, 32 $\pm$ 12          | 1, 48    | 12, 12 $\pm$ 4           | 3, 19       | 121, 110 $\pm$ 37                             | 4, 146      | 30, 28 $\pm$ 10          | 12, 46      |
| 1                                               | 25, 24 $\pm$ 8           | 2, 35    | 8, 8 $\pm$ 3             | 2, 13       | 99, 92 $\pm$ 29                               | 11, 125     | 26, 25 $\pm$ 8           | 7, 35       |
| 2                                               | 17, 16 $\pm$ 5           | 2, 21    | 5, 4 $\pm$ 2             | 1, 8        | 70, 64 $\pm$ 20                               | 9, 82       | 20, 18 $\pm$ 7           | 3, 26       |
| 3                                               | 12, 11 $\pm$ 4           | 1, 14    | 4, 4 $\pm$ 1             | 1, 6        | 49, 45 $\pm$ 15                               | 5, 60       | 15, 15 $\pm$ 4           | 7, 20       |
| 4                                               | 10, 9 $\pm$ 2            | 1, 11    | 3, 3 $\pm$ 1             | 2, 4        | 40, 37 $\pm$ 8                                | 8, 46       | 12, 12 $\pm$ 3           | 6, 16       |
| 5                                               | 8, 7 $\pm$ 2             | 2, 10    | 3, 3 $\pm$ 1             | 1, 4        | 32, 31 $\pm$ 7                                | 8, 39       | 10, 10 $\pm$ 3           | 5, 15       |

Supplementary Table 8

| Benchmarking of scaling impact on MoS <sub>2</sub> FETs<br>(parentheses show the number of devices used for the study) |                                 |                              |                                                        |                              |                               |
|------------------------------------------------------------------------------------------------------------------------|---------------------------------|------------------------------|--------------------------------------------------------|------------------------------|-------------------------------|
|                                                                                                                        | $\mu_{gm} (cm^2 V^{-1} s^{-1})$ |                              |                                                        | $I_{ON} (\mu A. \mu m^{-1})$ |                               |
|                                                                                                                        | Our work                        | [3]                          | [4]                                                    | Our work                     | [3]                           |
| $L_{CH}$<br>( $\mu m$ )                                                                                                | Median, Mean $\pm$<br>SD        | Median, Mean $\pm$<br>SD     | Median, Mean $\pm$<br>SD                               | Median, Mean $\pm$<br>SD     | Median, Mean $\pm$<br>SD      |
| 0.1                                                                                                                    | 3.6, 4 $\pm$ 1 (17)             | 3, 2.7 $\pm$ 0.9 (17)        |                                                        | 100, 99 $\pm$ 23 (17)        | 39.6, 36.7 $\pm$ 14.2<br>(17) |
| 0.2                                                                                                                    | 7.2, 6.6 $\pm$ 3.1 (22)         | 5, 4.6 $\pm$ 1.7 (24)        |                                                        | 87, 78 $\pm$ 33 (22)         | 28.4, 27.1 $\pm$ 12.2<br>(24) |
| 0.3                                                                                                                    | 9.5, 8.9 $\pm$ 3.7 (22)         |                              |                                                        | 79, 72 $\pm$ 25 (23)         |                               |
| 0.4                                                                                                                    | 11.3, 9.1 $\pm$ 4.3 (23)        |                              |                                                        | 69, 59 $\pm$ 26 (23)         |                               |
| 0.5                                                                                                                    | 11.7, 10.8 $\pm$ 5.1<br>(23)    | 9.2, 8.5 $\pm$ 3 (27)        |                                                        | 66, 62 $\pm$ 22 (23)         | 25.1, 22.3 $\pm$ 10 (27)      |
| 1                                                                                                                      | 14.7, 14.2 $\pm$ 5.4<br>(21)    | 11.1, 10.5 $\pm$ 3.4<br>(27) |                                                        | 49, 46 $\pm$ 15 (23)         | 12.1, 12.9 $\pm$ 5 (27)       |
| 2                                                                                                                      | 19.3, 17.8 $\pm$ 7.3<br>(21)    |                              |                                                        | 32, 30 $\pm$ 10 (22)         |                               |
| 3                                                                                                                      | 17.8, 20.1 $\pm$ 4 (15)         |                              |                                                        | 23, 21 $\pm$ 7 (19)          |                               |
| 4                                                                                                                      | 22.5, 23.1 $\pm$ 3.6<br>(19)    |                              | Nil, 34.2 $\pm$ 3.6<br>(200)<br>$L_{CH} = 4-8.6 \mu m$ | 19, 17 $\pm$ 4 (20)          |                               |
| 5                                                                                                                      | 23.9, 24.2 $\pm$ 3.1<br>(17)    |                              |                                                        | 15, 14 $\pm$ 3 (19)          |                               |

## Supplementary Figure 7

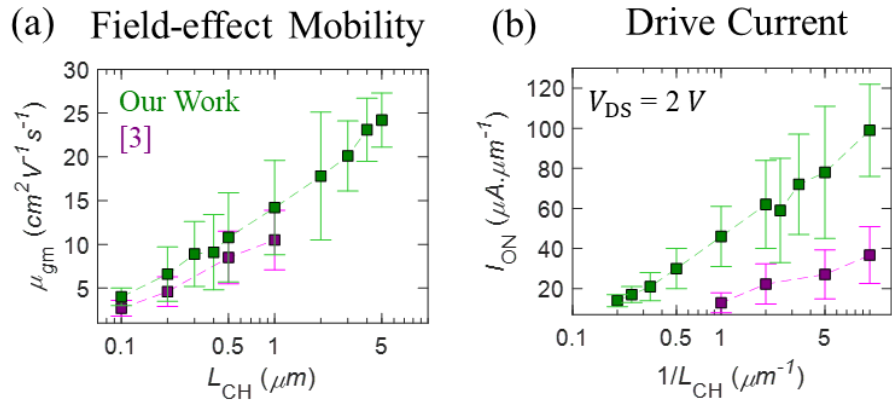

Supplementary Figure 7. Benchmarking scaling of MoS<sub>2</sub> FETs. Channel length dependent statistics with literature for a) field-effect mobility and b) drive current for synthetic monolayer MoS<sub>2</sub> FETs. Using error bar plots, mean and standard deviation is shown.

## Supplementary Table 9

| Device-to-device variation in saturation velocity |                   |           |                   |          |
|---------------------------------------------------|-------------------|-----------|-------------------|----------|
|                                                   | MoS <sub>2</sub>  |           | WS <sub>2</sub>   |          |
|                                                   | Median, Mean ± SD | Min, Max  | Median, Mean ± SD | Min, Max |
| $v_{SAT}$ ( $cm \cdot sec^{-1}$ ) ( $10^5$ )      | 6.4, 5.9 ± 2.5    | 0.2, 11.2 | 4, 4.1 ± 1.5      | 1, 6.9   |

## Supplementary References

- [1] Q. Smets, B. Groven, M. Caymax, I. Radu, G. Arutchelvan, J. Jussot, *et al.*, "Ultra-scaled MOCVD MoS<sub>2</sub> MOSFETs with 42nm contact pitch and 250 $\mu$ A/ $\mu$ m drain current," pp. 23.2.1-23.2.4, 2019.
- [2] C. Min, T. Kamins, P. V. Voorde, C. Diaz, and W. Greene, "0.18- $\mu$ m fully-depleted silicon-on-insulator MOSFET's," *IEEE Electron Device Letters*, vol. 18, pp. 251-253, 1997.
- [3] H. Liu, M. Si, S. Najmaei, A. T. Neal, Y. Du, P. M. Ajayan, *et al.*, "Statistical study of deep submicron dual-gated field-effect transistors on monolayer chemical vapor deposition molybdenum disulfide films," *Nano Lett*, vol. 13, pp. 2640-6, Jun 12 2013.
- [4] K. K. H. Smithe, S. V. Suryavanshi, M. Munoz Rojo, A. D. Tedjarati, and E. Pop, "Low Variability in Synthetic Monolayer MoS<sub>2</sub> Devices," *ACS Nano*, vol. 11, pp. 8456-8463, Aug 22 2017.
