# Supplementary material for: Benchmarking monolayer MoS2 and WS2 field-effect transistors
Source: PubMed Central journal article supplement (PMC7846590; doi:10.1038/s41467-020-20732-w), 2021-01-29
Supplement: 41467_2020_20732_MOESM3_ESM.pdf [file 41467_2020_20732_MOESM3_ESM.pdf]

## Solar Cells Reporting Summary

Nature Research wishes to improve the reproducibility of the work that we publish. This form is intended for publication with all accepted papers reporting the characterization of photovoltaic devices and provides structure for consistency and transparency in reporting. Some list items might not apply to an individual manuscript, but all fields must be completed for clarity.

For further information on Nature Research policies, including our [data availability policy](#), see [Authors & Referees](#).

### ~ Experimental design

**Please check: are the following details reported in the manuscript?**

#### 1. Dimensions

|                                          |                                                                        |                                  |
|------------------------------------------|------------------------------------------------------------------------|----------------------------------|
| Area of the tested solar cells           | <input type="checkbox"/> Yes<br><input checked="" type="checkbox"/> No | <input type="text" value="N/A"/> |
| Method used to determine the device area | <input type="checkbox"/> Yes<br><input checked="" type="checkbox"/> No | <input type="text" value="N/A"/> |

#### 2. Current-voltage characterization

|                                                                                                                                                                                                |                                                                        |                                  |
|------------------------------------------------------------------------------------------------------------------------------------------------------------------------------------------------|------------------------------------------------------------------------|----------------------------------|
| Current density-voltage (J-V) plots in both forward and backward direction                                                                                                                     | <input type="checkbox"/> Yes<br><input checked="" type="checkbox"/> No | <input type="text" value="N/A"/> |
| Voltage scan conditions<br><i>For instance: scan direction, speed, dwell times</i>                                                                                                             | <input type="checkbox"/> Yes<br><input checked="" type="checkbox"/> No | <input type="text" value="N/A"/> |
| Test environment<br><i>For instance: characterization temperature, in air or in glove box</i>                                                                                                  | <input type="checkbox"/> Yes<br><input checked="" type="checkbox"/> No | <input type="text" value="N/A"/> |
| Protocol for preconditioning of the device before its characterization                                                                                                                         | <input type="checkbox"/> Yes<br><input checked="" type="checkbox"/> No | <input type="text" value="N/A"/> |
| Stability of the J-V characteristic<br><i>Verified with time evolution of the maximum power point or with the photocurrent at maximum power point; see <a href="#">ref. 7</a> for details.</i> | <input type="checkbox"/> Yes<br><input checked="" type="checkbox"/> No | <input type="text" value="N/A"/> |

#### 3. Hysteresis or any other unusual behaviour

|                                                                           |                                                                        |                                  |
|---------------------------------------------------------------------------|------------------------------------------------------------------------|----------------------------------|
| Description of the unusual behaviour observed during the characterization | <input type="checkbox"/> Yes<br><input checked="" type="checkbox"/> No | <input type="text" value="N/A"/> |
| Related experimental data                                                 | <input type="checkbox"/> Yes<br><input checked="" type="checkbox"/> No | <input type="text" value="N/A"/> |

#### 4. Efficiency

|                                                                                                                                 |                                                                        |                                  |
|---------------------------------------------------------------------------------------------------------------------------------|------------------------------------------------------------------------|----------------------------------|
| External quantum efficiency (EQE) or incident photons to current efficiency (IPCE)                                              | <input type="checkbox"/> Yes<br><input checked="" type="checkbox"/> No | <input type="text" value="N/A"/> |
| A comparison between the integrated response under the standard reference spectrum and the response measure under the simulator | <input type="checkbox"/> Yes<br><input checked="" type="checkbox"/> No | <input type="text" value="N/A"/> |
| For tandem solar cells, the bias illumination and bias voltage used for each subcell                                            | <input type="checkbox"/> Yes<br><input checked="" type="checkbox"/> No | <input type="text" value="N/A"/> |

#### 5. Calibration

|                                                                         |                                                                        |                                  |
|-------------------------------------------------------------------------|------------------------------------------------------------------------|----------------------------------|
| Light source and reference cell or sensor used for the characterization | <input type="checkbox"/> Yes<br><input checked="" type="checkbox"/> No | <input type="text" value="N/A"/> |
| Confirmation that the reference cell was calibrated and certified       | <input type="checkbox"/> Yes<br><input checked="" type="checkbox"/> No | <input type="text" value="N/A"/> |

- Calculation of spectral mismatch between the reference cell and the devices under test  
 Yes N/A  
 No
6. Mask/aperture
- Size of the mask/aperture used during testing  
 Yes N/A  
 No
- Variation of the measured short-circuit current density with the mask/aperture area  
 Yes N/A  
 No
7. Performance certification
- Identity of the independent certification laboratory that confirmed the photovoltaic performance  
 Yes N/A  
 No
- A copy of any certificate(s)  
*Provide in Supplementary Information*  
 Yes N/A  
 No
8. Statistics
- Number of solar cells tested  
 Yes N/A  
 No
- Statistical analysis of the device performance  
 Yes N/A  
 No
9. Long-term stability analysis
- Type of analysis, bias conditions and environmental conditions  
*For instance: illumination type, temperature, atmosphere humidity, encapsulation method, preconditioning temperature*  
 Yes N/A  
 No
